# Supplementary material for: Effects of chirality and side chain length in Cα,α-dialkylated residues on β-hairpin peptide folded structure and stability
Source: Royal Society of Chemistry journal article supplement (doi:10.1039/d3ob00963g), 2023-01-01
Supplement: d3ob00963g1.pdf [file d3ob00963g1.pdf]

**Effects of Chirality and Side Chain Length in C<sub>α,α</sub>-Dialkylated Residues on β-Hairpin Peptide  
Folded Structure and Stability**

Shelby L. Heath, W. Seth Horne, George A. Lengyel

Department of Chemistry, Slippery Rock University, Slippery Rock, Pennsylvania 16057, United States

Department of Chemistry, University of Pittsburgh, Pittsburgh, Pennsylvania 15260, United States

**SUPPORTING INFORMATION**

**Contents**

|                           |        |
|---------------------------|--------|
| Experimental Methods..... | S2-S4  |
| Supplemental Figures..... | S5-S7  |
| Supplemental Tables.....  | S8-S15 |
| References.....           | S16    |

**General Information.** HCTU, PyAOP, Fmoc-protected  $\alpha$ -amino acids, and Fmoc-protected  $C_{\alpha,\alpha}$ -dialkylated  $\alpha$ -amino acids were purchased from NovaBioChem, Chem-Impex, or ChemSpace. NovaPEG Rink Amide Resin was purchased from NovaBioChem. Solvents and all other reagents were purchased from Fisher Scientific or Millipore Sigma used as received without further purification.

**Peptide Synthesis.** Peptides were synthesized using Fmoc solid-phase synthesis methods with a CEM Mars manual peptide synthesizer on NovaPEG Rink Amide resin. Couplings were completed with a 90 second ramp to 90 °C and a total run time of 3.5 minutes using Fmoc-protected amino acid (6 equiv relative to resin), HCTU (6 equiv), and DIEA (10 equiv) in *N*-methyl-2-pyrrolidone. Deprotections were completed with a 90 second ramp to 90 °C and a total run time of 3 minutes using an excess of 20% 4-methylpiperidine in DMF. After each coupling or deprotection cycle, the resin was washed three times with DMF. Residue Asn6 was double coupled in each peptide.

For peptides **3a-3b**, residue X13 (6 equiv) was coupled with PyAOP (6 equiv). For peptides **4a-4b**, residue X13 (4 equiv) was coupled with PyAOP (4 equiv). Directly following the  $C_{\alpha,\alpha}$ -dialkylated  $\alpha$ -amino acid at position 13, residue Phe12 was double coupled with PyAOP (6 equiv). After this double coupling, the peptide was capped by acetylation with a solution of 8:2:1 DMF:DIEA:Ac<sub>2</sub>O. In syntheses where capping was not employed, multiple deletion products were seen resulting from incomplete coupling of the residue following the bulky  $C_{\alpha,\alpha}$ -dialkylated residue.

Prior to cleavage, the resin was washed three times each with DMF, dichloromethane, and methanol then dried under vacuum. Peptides were cleaved from resin using a solution of TFA/H<sub>2</sub>O/TIS (95%/2.5%/2.5%) for 3 hours. After precipitating in cold diethyl ether, the solutions were centrifuged and the pelleted solids were dissolved in 10% acetonitrile in water containing 0.1% TFA and sonicated for 30 minutes. Peptides were purified by RP-HPLC using a Phenomenex Luna C18 column with gradients between 0.1% TFA in H<sub>2</sub>O and 0.1% TFA in acetonitrile then lyophilized. Peptide identity and purity were determined by mass spectrometry (ESI-MS, Table S1) and analytical RP-HPLC, respectively (Figure S1).

**NMR Sample Preparation and Data Collection.** NMR samples were prepared by dissolving 2-3 mg peptide in 650  $\mu$ L de-gassed buffer solution (50 mM phosphate, 9:1 H<sub>2</sub>O/D<sub>2</sub>O, uncorrected pH 6.3) to make ~2 mM solutions. 3-(Trimethylsilyl)-1-propanesulfonic acid sodium salt (DSS, 50 mM in water) was added to a final concentration of ~0.2 mM DSS in the sample. The NMR tube headspace was purged with a stream of nitrogen prior to capping.

NMR spectra of peptides were recorded on a Bruker Avance-700 spectrometer. Chemical shifts are reported relative to DSS (0 ppm). TOCSY, NOESY, and COSY pulse programs used excitation-sculpted gradient-pulse solvent suppression. All experiments were obtained using 2048 data points in the direct dimension and 512 data points in the indirect dimension. TOCSY were acquired with a mixing time of 80 ms and NOESY were acquired with a mixing time of 200 ms.

**NMR Data Analysis.** Backbone <sup>1</sup>H resonance assignments for peptides **1** and **2** were previously reported, and the data are included here for comparison to new compounds (Table S2, S3).<sup>1</sup> Backbone <sup>1</sup>H resonance assignments for peptides **3a**, **3b**, **4a**, and **4b** (Table S4-S7) were assembled manually from the corresponding 2D NMR experiments described above using the NMRFAM-SPARKY<sup>2</sup> and POKY<sup>3</sup> software packages.

Folded populations for each peptide were estimated using the separation of diastereotopic H <sub>$\alpha$</sub>  signals for residue G10. TOCSY cross-peaks were selected on both sides of the diagonal corresponding the geminal coupling between these protons, and the chemical shift for each resonance tabulated from the value observed in the direct dimension (Figure S2). The resulting difference in resonance frequency ( $\Delta\delta$ ) was

used to calculate folded population and  $\Delta G_{\text{fold}}$  as previously described.<sup>4</sup> Reference  $\Delta\delta$  values of 0 ppm and 0.310 ppm were used for the fully unfolded and fully folded states, respectively.<sup>1</sup> For peptides **4a** and **4b**, the above analysis was repeated for a series of TOCSY spectra acquired on the same sample at a range of temperatures from 278 to 318 K (Figure S3, Table S8, S9) and fit to obtain thermodynamic parameters for the folding equilibrium following methods described.<sup>4</sup>

**NMR Structure Determination** For peptides **4a** and **4b**, full <sup>1</sup>H resonance assignment was completed, and a folded structure of each determined using simulated annealing with NMR-derived restraints. A structure of peptide **1** was calculated using the same methods and data from previously reported experiments.<sup>1</sup> NMR structure calculations were performed using ARIA (Ambiguous Restraints for Iterative Assignment, version 2.3)<sup>5</sup> and CNS (Crystallography & NMR System, version 1.2).<sup>6</sup> Parameter and topology definitions for the artificial  $\alpha(\text{Et})\text{Nva}$  monomer were assembled by hand based on analogous atom types already present in the force field. ARIA settings were modified from program defaults based on reported optimizations to improve model quality and convergence.<sup>7</sup> The structure calculation proceeded in two rounds. The first run used as input the resonance assignments for the peptide and a list of unassigned integrated NOESY peaks. NOE distance restraints were generated automatically by ARIA from this information in iterative fashion over the calculation. The ensemble resulting from run 1 was used to estimate the rotational correlation time of the peptide using the program HYDROPRO<sup>8</sup> as well as assess backbone hydrogen bonds present in the structure. The second simulated annealing run was initiated from the run 1 ensemble and proceeded identically to the first run, except for the addition of hydrogen bond restraints and the use of the spin diffusion correction option in ARIA.<sup>9</sup> The set of 10 lowest energy models resulting from the second run were taken as the final NMR ensemble of each peptide (Table S10). As discussed in the text, the NMR data set for **4a** was used to calculate the structure of its enantiomer (*ent-4a*). Coordinates and associated experimental data have been deposited in the PDB (**1**: 8T0G, *ent-4a*: 8T0H, **4b**: 8T0I) and BMRB (**1**: 31089, *ent-4a*: 31090, **4b**: 31091).

**Figure S1.** Pure analytical HPLC traces for peptides **2-4b**. Each peptide was analyzed using an increasing gradient (20% to 30%) of acetonitrile in water with 0.1% trifluoroacetic acid.

Analytical HPLC for **2**

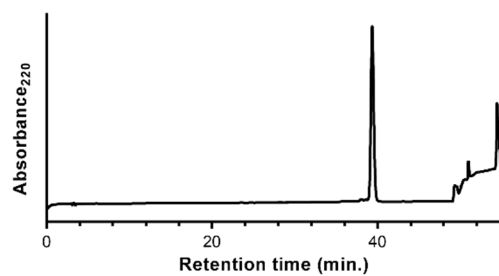

Analytical HPLC for **3a**

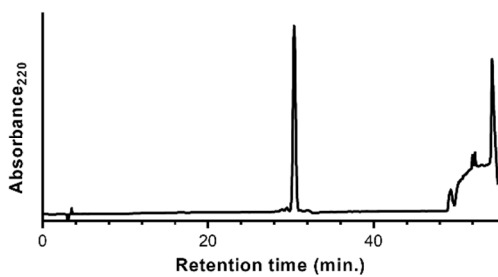

Analytical HPLC for **3b**

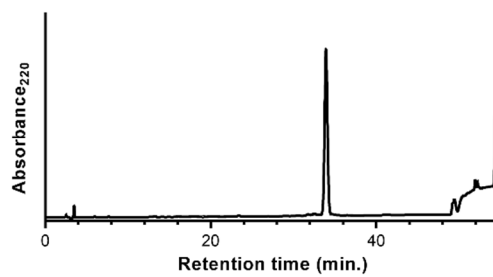

Analytical HPLC for **4a**

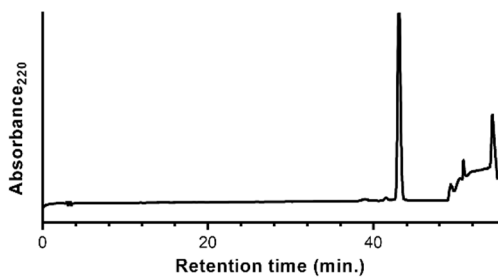

Analytical HPLC for **4b**

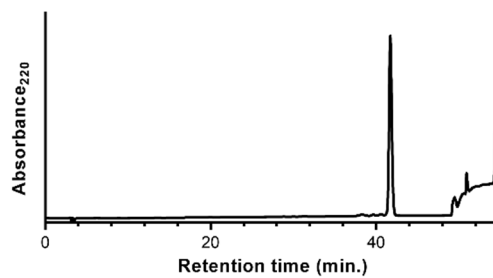

**Figure S2.** Selected regions of the TOCSY spectra of peptides **1-4b** at 298 K. Dashed lines indicate chemical shifts of the two diastereotopic protons of Gly<sub>10</sub>.

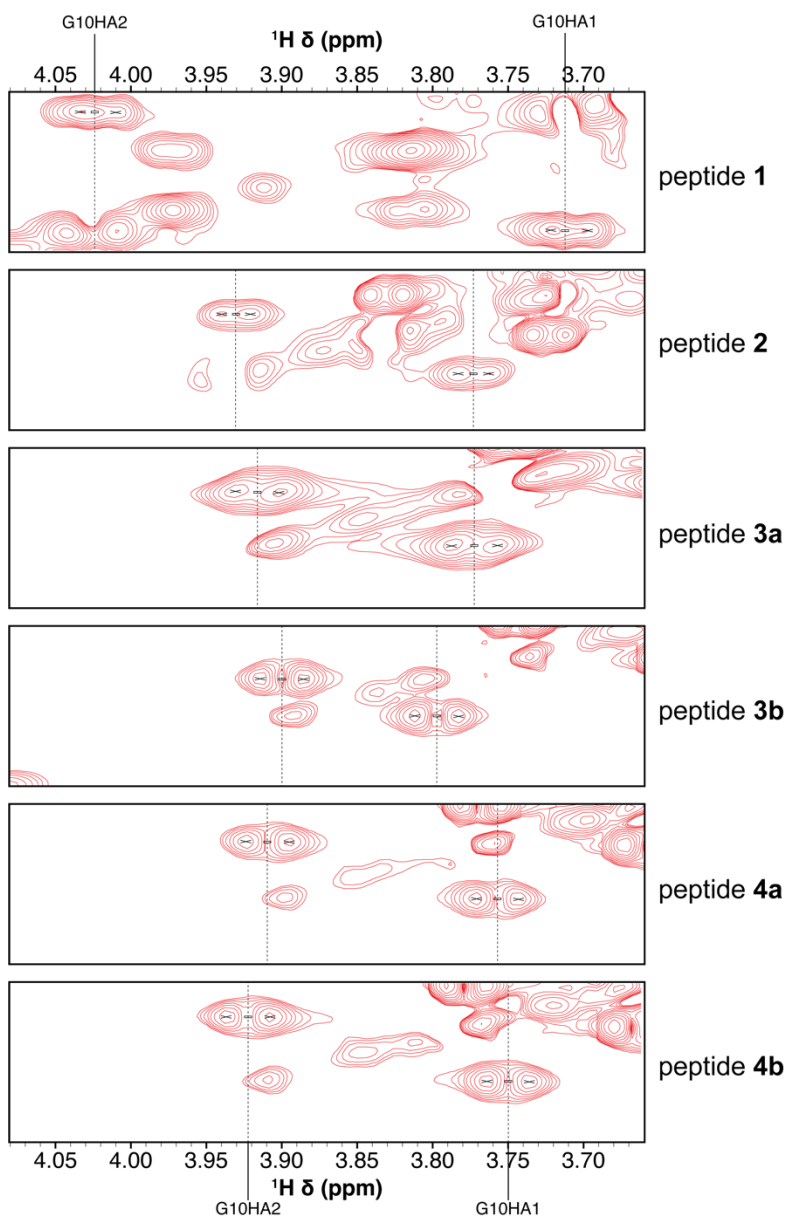

**Figure S3.** Thermal denaturation melt NMR spectra for peptides **4a** and **4b**. Dashed lines indicate chemical shifts of the two diastereotopic protons of Gly<sub>10</sub> at 278 K.

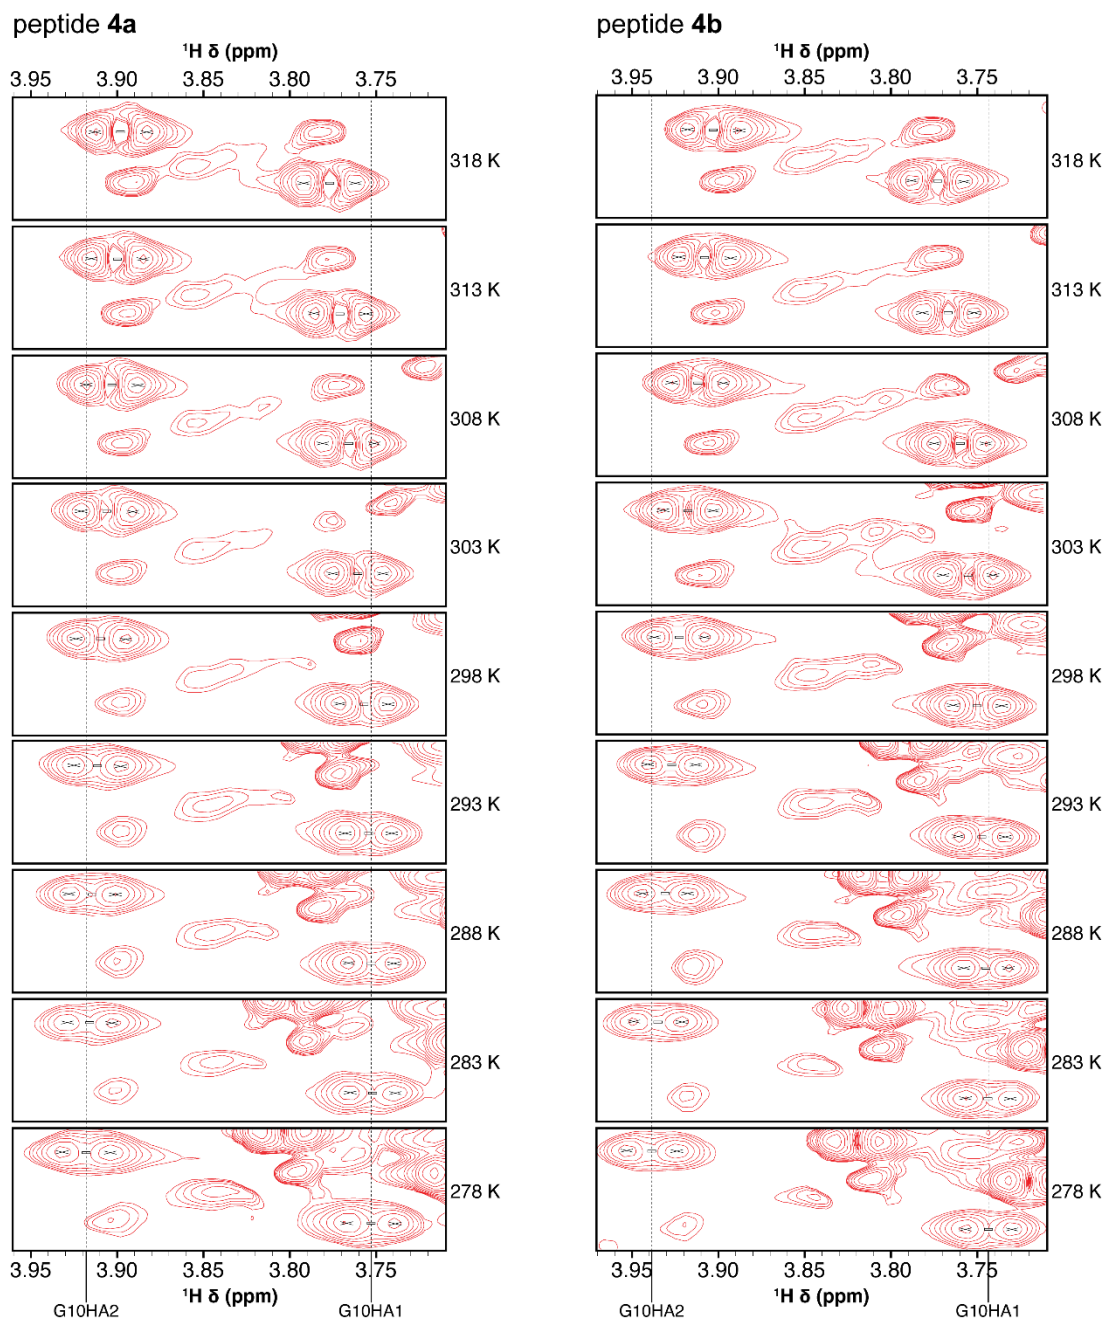

**Table S1.** ESI-MS Data for Peptides **2-4b**.

| Peptide   | Calculated $m/z$<br>(M+H) <sup>+</sup> | Observed $m/z$<br>(M+H) <sup>+</sup> |
|-----------|----------------------------------------|--------------------------------------|
| <b>2</b>  | 1869.88                                | 1869.89                              |
| <b>3a</b> | 1855.86                                | 1855.87                              |
| <b>3b</b> | 1855.86                                | 1855.87                              |
| <b>4a</b> | 1883.90                                | 1883.91                              |
| <b>4b</b> | 1883.90                                | 1883.91                              |

**Table S2.** Backbone Chemical Shift Assignments for Peptide **1** (298 K).

| <b>Residue</b> | <b>Atom</b>     | <b>Chemical Shift (ppm)</b> |
|----------------|-----------------|-----------------------------|
| G1             | H <sub>α1</sub> | *                           |
| G1             | H <sub>α2</sub> | *                           |
| E2             | H               | 7.817                       |
| E2             | H <sub>α</sub>  | 4.453                       |
| W3             | H               | 8.747                       |
| W3             | H <sub>α</sub>  | 4.859                       |
| A4             | H               | 8.868                       |
| A4             | H <sub>α</sub>  | 4.760                       |
| Y5             | H               | 8.774                       |
| Y5             | H <sub>α</sub>  | 3.648                       |
| N6             | H               | 7.716                       |
| N6             | H <sub>α</sub>  | 4.957                       |
| P7             | H <sub>α</sub>  | 3.972                       |
| A8             | H               | 7.835                       |
| A8             | H <sub>α</sub>  | 4.207                       |
| T9             | H               | 7.062                       |
| T9             | H <sub>α</sub>  | 4.398                       |
| G10            | H               | 8.318                       |
| G10            | H <sub>α1</sub> | 3.720                       |
| G10            | H <sub>α2</sub> | 4.032                       |
| K11            | H               | 7.344                       |
| K11            | H <sub>α</sub>  | 4.704                       |
| F12            | H               | 8.642                       |
| F12            | H <sub>α</sub>  | 4.816                       |
| A13            | H               | 8.734                       |
| A13            | H <sub>α</sub>  | 4.684                       |
| W14            | H               | 8.659                       |
| W14            | H <sub>α</sub>  | 4.622                       |
| T15            | H               | 8.357                       |
| T15            | H <sub>α</sub>  | 4.398                       |
| E16            | H               | 8.338                       |
| E16            | H <sub>α</sub>  | 4.789                       |

\*Not included due to ambiguous assignment.



**Table S3.** Backbone Chemical Shift Assignments for Peptide 2 (298 K).

| <b>Residue</b> | <b>Atom</b>     | <b>Chemical Shift (ppm)</b> |
|----------------|-----------------|-----------------------------|
| G1             | H <sub>α1</sub> | *                           |
| G1             | H <sub>α2</sub> | *                           |
| E2             | H               | *                           |
| E2             | H <sub>α</sub>  | 4.419                       |
| W3             | H               | 8.384                       |
| W3             | H <sub>α</sub>  | 4.646                       |
| A4             | H               | 8.292                       |
| A4             | H <sub>α</sub>  | 4.371                       |
| Y5             | H               | 8.021                       |
| Y5             | H <sub>α</sub>  | 4.203                       |
| N6             | H               | 8.031                       |
| N6             | H <sub>α</sub>  | 4.861                       |
| P7             | H <sub>α</sub>  | 4.132                       |
| A8             | H               | 7.982                       |
| A8             | H <sub>α</sub>  | 4.239                       |
| T9             | H               | 7.424                       |
| T9             | H <sub>α</sub>  | 4.313                       |
| G10            | H               | 8.240                       |
| G10            | H <sub>α1</sub> | 3.758                       |
| G10            | H <sub>α2</sub> | 3.925                       |
| K11            | H               | 7.568                       |
| K11            | H <sub>α</sub>  | 4.353                       |
| F12            | H               | 8.195                       |
| F12            | H <sub>α</sub>  | 4.717                       |
| X13            | H               | 8.073                       |
| W14            | H               | 7.591                       |
| W14            | H <sub>α</sub>  | 4.922                       |
| T15            | H               | 8.200                       |
| T15            | H <sub>α</sub>  | 4.324                       |
| E16            | H               | 8.172                       |
| E16            | H <sub>α</sub>  | 4.229                       |

\*Not included due to ambiguous assignment.

**Table S4.** Backbone Chemical Shift Assignments for Peptide **3a** (298 K).

| <b>Residue</b> | <b>Atom</b>     | <b>Chemical Shift (ppm)</b> |
|----------------|-----------------|-----------------------------|
| G1             | H <sub>α1</sub> | *                           |
| G1             | H <sub>α2</sub> | *                           |
| E2             | H               | *                           |
| E2             | H <sub>α</sub>  | 4.213                       |
| W3             | H               | 8.237                       |
| W3             | H <sub>α</sub>  | 4.578                       |
| A4             | H               | 8.087                       |
| A4             | H <sub>α</sub>  | 4.219                       |
| Y5             | H               | 7.913                       |
| Y5             | H <sub>α</sub>  | 4.178                       |
| N6             | H               | 8.010                       |
| N6             | H <sub>α</sub>  | 4.765                       |
| P7             | H <sub>α</sub>  | 4.094                       |
| A8             | H               | 7.953                       |
| A8             | H <sub>α</sub>  | 4.161                       |
| T9             | H               | 7.421                       |
| T9             | H <sub>α</sub>  | 4.213                       |
| G10            | H               | 8.169                       |
| G10            | H <sub>α1</sub> | 3.689                       |
| G10            | H <sub>α2</sub> | 3.827                       |
| K11            | H               | 7.571                       |
| K11            | H <sub>α</sub>  | 4.183                       |
| F12            | H               | 8.138                       |
| F12            | H <sub>α</sub>  | 4.455                       |
| X13            | H               | 8.112                       |
| W14            | H               | 7.343                       |
| W14            | H <sub>α</sub>  | 4.610                       |
| T15            | H               | 7.785                       |
| T15            | H <sub>α</sub>  | 4.155                       |
| E16            | H               | 7.878                       |
| E16            | H <sub>α</sub>  | 4.104                       |

\*Not included due to ambiguous assignment.

**Table S5.** Backbone Chemical Shift Assignments for Peptide **3b** (298 K).

| <b>Residue</b> | <b>Atom</b>     | <b>Chemical Shift (ppm)</b> |
|----------------|-----------------|-----------------------------|
| G1             | H <sub>α1</sub> | *                           |
| G1             | H <sub>α2</sub> | *                           |
| E2             | H               | *                           |
| E2             | H <sub>α</sub>  | *                           |
| W3             | H               | 8.286                       |
| W3             | H <sub>α</sub>  | 4.667                       |
| A4             | H               | 8.120                       |
| A4             | H <sub>α</sub>  | 4.284                       |
| Y5             | H               | 8.277                       |
| Y5             | H <sub>α</sub>  | 4.565                       |
| N6             | H               | 8.089                       |
| N6             | H <sub>α</sub>  | 4.839                       |
| P7             | H <sub>α</sub>  | 4.187                       |
| A8             | H               | 8.050                       |
| A8             | H <sub>α</sub>  | 4.240                       |
| T9             | H               | 7.539                       |
| T9             | H <sub>α</sub>  | 4.251                       |
| G10            | H               | 8.207                       |
| G10            | H <sub>α1</sub> | 3.802                       |
| G10            | H <sub>α2</sub> | 3.898                       |
| K11            | H               | 7.705                       |
| K11            | H <sub>α</sub>  | 4.284                       |
| F12            | H               | 7.967                       |
| F12            | H <sub>α</sub>  | 4.336                       |
| X13            | H               | 4.330                       |
| W14            | H               | 7.547                       |
| W14            | H <sub>α</sub>  | 4.641                       |
| T15            | H               | 7.705                       |
| T15            | H <sub>α</sub>  | 4.162                       |
| E16            | H               | 7.891                       |
| E16            | H <sub>α</sub>  | 4.110                       |

\*Not included due to ambiguous assignment.

**Table S6.** Backbone Chemical Shift Assignments for Peptide **4a** (298 K).

| <b>Residue</b> | <b>Atom</b>     | <b>Chemical Shift (ppm)</b> |
|----------------|-----------------|-----------------------------|
| G1             | H <sub>α1</sub> | *                           |
| G1             | H <sub>α2</sub> | *                           |
| E2             | H               | *                           |
| E2             | H <sub>α</sub>  | 4.367                       |
| W3             | H               | 8.346                       |
| W3             | H <sub>α</sub>  | 4.645                       |
| A4             | H               | 8.226                       |
| A4             | H <sub>α</sub>  | 4.325                       |
| Y5             | H               | 7.965                       |
| Y5             | H <sub>α</sub>  | 4.275                       |
| N6             | H               | 8.069                       |
| N6             | H <sub>α</sub>  | 4.485                       |
| P7             | H <sub>α</sub>  | 4.147                       |
| A8             | H               | 7.995                       |
| A8             | H <sub>α</sub>  | 4.247                       |
| T9             | H               | 7.451                       |
| T9             | H <sub>α</sub>  | 4.302                       |
| G10            | H               | 8.242                       |
| G10            | H <sub>α1</sub> | 3.767                       |
| G10            | H <sub>α2</sub> | 3.909                       |
| K11            | H               | 7.568                       |
| K11            | H <sub>α</sub>  | 4.318                       |
| F12            | H               | 8.230                       |
| F12            | H <sub>α</sub>  | 4.688                       |
| X13            | H               | 8.154                       |
| W14            | H               | 7.484                       |
| W14            | H <sub>α</sub>  | 4.831                       |
| T15            | H               | 8.032                       |
| T15            | H <sub>α</sub>  | 4.301                       |
| E16            | H               | 8.045                       |
| E16            | H <sub>α</sub>  | 4.202                       |

\*Not included due to ambiguous assignment.

**Table S7.** Backbone Chemical Shift Assignments for Peptide **4b** (298 K).

| <b>Residue</b> | <b>Atom</b>     | <b>Chemical Shift (ppm)</b> |
|----------------|-----------------|-----------------------------|
| G1             | H <sub>α1</sub> | *                           |
| G1             | H <sub>α2</sub> | *                           |
| E2             | H               | *                           |
| E2             | H <sub>α</sub>  | 4.419                       |
| W3             | H               | 8.384                       |
| W3             | H <sub>α</sub>  | 4.646                       |
| A4             | H               | 8.292                       |
| A4             | H <sub>α</sub>  | 4.371                       |
| Y5             | H               | 8.021                       |
| Y5             | H <sub>α</sub>  | 4.203                       |
| N6             | H               | 8.031                       |
| N6             | H <sub>α</sub>  | 4.861                       |
| P7             | H <sub>α</sub>  | 4.132                       |
| A8             | H               | 7.982                       |
| A8             | H <sub>α</sub>  | 4.239                       |
| T9             | H               | 7.424                       |
| T9             | H <sub>α</sub>  | 4.313                       |
| G10            | H               | 8.241                       |
| G10            | H <sub>α1</sub> | 3.758                       |
| G10            | H <sub>α2</sub> | 3.925                       |
| K11            | H               | 7.568                       |
| K11            | H <sub>α</sub>  | 4.353                       |
| F12            | H               | 8.195                       |
| F12            | H <sub>α</sub>  | 4.717                       |
| X13            | H               | 8.072                       |
| W14            | H               | 7.591                       |
| W14            | H <sub>α</sub>  | 4.922                       |
| T15            | H               | 8.200                       |
| T15            | H <sub>α</sub>  | 4.324                       |
| E16            | H               | 8.172                       |
| E16            | H <sub>α</sub>  | 4.229                       |

\*Not included due to ambiguous assignment.

**Table S8.** Gly10 H<sub>α1</sub> and H<sub>α2</sub> Chemical Shift Assignments for Peptide **4a** as a Function of Temperature.

| temp (K) | G10 H <sub>α1</sub> | G10 H <sub>α2</sub> | Δδ (ppm) | fraction folded | ΔG (kcal/mol) |
|----------|---------------------|---------------------|----------|-----------------|---------------|
| 278      | 3.753               | 3.918               | 0.165    | 0.532           | -0.071        |
| 283      | 3.752               | 3.916               | 0.164    | 0.529           | -0.065        |
| 288      | 3.753               | 3.914               | 0.161    | 0.519           | -0.044        |
| 293      | 3.754               | 3.912               | 0.158    | 0.510           | -0.023        |
| 298      | 3.757               | 3.909               | 0.152    | 0.490           | 0.023         |
| 303      | 3.760               | 3.906               | 0.146    | 0.471           | 0.070         |
| 308      | 3.766               | 3.903               | 0.137    | 0.442           | 0.143         |
| 313      | 3.771               | 3.900               | 0.129    | 0.416           | 0.211         |
| 318      | 3.777               | 3.898               | 0.121    | 0.390           | 0.282         |

**Table S9.** Gly10 H<sub>α1</sub> and H<sub>α2</sub> Chemical Shift Assignments for Peptide **4b** as a Function of Temperature.

| temp (K) | G10 H <sub>α1</sub> | G10 H <sub>α2</sub> | Δδ (ppm) | fraction folded | ΔG (kcal/mol) |
|----------|---------------------|---------------------|----------|-----------------|---------------|
| 278      | 3.743               | 3.939               | 0.196    | 0.632           | -0.299        |
| 283      | 3.744               | 3.935               | 0.191    | 0.616           | -0.266        |
| 288      | 3.745               | 3.931               | 0.186    | 0.600           | -0.232        |
| 293      | 3.747               | 3.927               | 0.18     | 0.581           | -0.189        |
| 298      | 3.750               | 3.922               | 0.172    | 0.555           | -0.130        |
| 303      | 3.755               | 3.918               | 0.163    | 0.526           | -0.062        |
| 308      | 3.760               | 3.912               | 0.152    | 0.490           | 0.024         |
| 313      | 3.767               | 3.908               | 0.141    | 0.455           | 0.113         |
| 318      | 3.773               | 3.903               | 0.130    | 0.419           | 0.206         |

**Table S10.** Statistics for NMR Structure Calculations of Peptides **1**, *ent-4a*, and **4b**

|                                    | <b>1</b>            | <i>ent-4a</i>       | <b>4b</b>           |
|------------------------------------|---------------------|---------------------|---------------------|
| <b>Experimental restraints</b>     |                     |                     |                     |
| Total NOEs                         | 247                 | 232                 | 260                 |
| Unambiguous NOEs                   | 231                 | 208                 | 220                 |
| Intra-residue                      | 114                 | 124                 | 121                 |
| Sequential ( $ i - j  = 1$ )       | 50                  | 47                  | 54                  |
| Medium-range ( $1 <  i - j  < 5$ ) | 23                  | 16                  | 11                  |
| Long-range ( $ i - j  \geq 5$ )    | 44                  | 21                  | 34                  |
| Ambiguous NOEs                     | 16                  | 24                  | 40                  |
| H-bonds                            | 12                  | 6                   | 8                   |
| <b>Violations</b>                  |                     |                     |                     |
| NOE $>0.5$ Å                       | $0.4 \pm 0.5$       | $1.4 \pm 1.0$       | $2.1 \pm 1.1$       |
| NOE rmsd (Å)                       | $0.037 \pm 0.02$    | $0.13 \pm 0.06$     | $0.10 \pm 0.05$     |
| H-bond $>0.5$ Å                    | 0                   | 0                   | 0                   |
| <b>Ensemble rmsd</b>               |                     |                     |                     |
| Backbone heavy atoms               | $0.61 \pm 0.23$     | $1.33 \pm 0.33$     | $1.52 \pm 0.34$     |
| All heavy atoms                    | $0.86 \pm 0.19$     | $1.50 \pm 0.34$     | $1.79 \pm 0.30$     |
| <b>Geometry analysis</b>           |                     |                     |                     |
| rmsd bonds (Å)                     | $0.0031 \pm 0.0002$ | $0.0030 \pm 0.0001$ | $0.0028 \pm 0.0002$ |
| rmsd angles (°)                    | $0.38 \pm 0.01$     | $0.43 \pm 0.01$     | $0.44 \pm 0.02$     |
| rmsd impropers (°)                 | $1.03 \pm 0.14$     | $0.83 \pm 0.13$     | $0.92 \pm 0.16$     |
| <b>Ramachandran analysis</b>       |                     |                     |                     |
| Favored (%)                        | 94.0                | 82.1                | 83.6                |
| Allowed (%)                        | 5.3                 | 15                  | 14.3                |
| Disallowed (%)                     | 0.7                 | 2.9                 | 2.1                 |

## References

- (1) M. A. Karnes, S. L. Schettler, H. M. Werner, A. F. Kurz, W. S. Horne, G. A. Lengyel, *Org. Lett.*, 2016, **18**, 3902.
- (2) W. Lee, M. Tonelli, J. L. Markley, *Bioinformatics*, 2015, **31**, 1325.
- (3) W. Lee, M. Rahimi, Y. Lee, A. Chiu, *Bioinformatics*, 2021, **37**, 3041.
- (4) S. R. Griffiths-Jones, A. J. Maynard, M. S. Searle, *J. Mol. Biol.*, 1999, **292**, 1051.
- (5) W. Rieping, M. Habeck, B. Bardiaux, A. Bernard, T. E. Malliavin, M. Nilges, *Bioinformatics* 2007, **23**, 381.
- (6) A. T. Brunger, *Nat. Protoc.*, 2007, **2**, 2728.
- (7) F. Mareuil, T. E. Malliavin, M. Nilges, B. Bardiaux, *J. Biomol. NMR*, 2015, **62**, 425.
- (8) J. García de la Torre, M. L. Huertas, B. Carrasco, *Biophys. J.*, 2000, **78**, 719.
- (9) J. P. Linge, M. Habeck, W. Rieping, M. Nilges, *J. Magn. Reson.*, 2004, **167**, 334.
